# Supplementary material for: Changes in DNA methylation assessed by genomic bisulfite sequencing suggest a role for DNA methylation in cotton fruiting branch development
Source: PeerJ. 2018 Jun 14;6:e4945. doi: 10.7717/peerj.4945 (PMC6004305; doi:10.7717/peerj.4945)
Supplement: Supplemental Information 16 [file peerj-06-4945-s016.xlsx]

## Sheet: Sheet1
Sample	region	C			CG			CHG			CHH
		Total	Coverage	Coverage	Total	Coverage	Coverage	Total	Coverage	Coverage	Total	Coverage	Coverage
		sites	sites	rate(%)	sites	sites	rate(%)	sites	sites	rate(%)	sites	sites	rate(%)
Gh1nm	Genebody	71888172	64520087	89.75	6969173	6223649	89.3	11111838	9944304	89.49	53807161	48352134	89.86
	Intron	38985473	35538616	91.16	2955334	2675415	90.53	5261274	4768535	90.63	30768865	28094666	91.31
	CDS	32870135	28953673	88.09	4010519	3545315	88.4	5846799	5172529	88.47	23012817	20235829	87.93
Gh2nm	Genebody	71888172	64650932	89.93	6969173	6237617	89.5	11111838	9969701	89.72	53807161	48443614	90.03
	Intron	38985473	35578852	91.26	2955334	2678716	90.64	5261274	4775523	90.77	30768865	28124613	91.41
	CDS	32870135	29044291	88.36	4010519	3555958	88.67	5846799	5190927	88.78	23012817	20297406	88.2
Gh3nm	Genebody	71888172	64758524	90.08	6969173	6249493	89.67	11111838	9988227	89.89	53807161	48520804	90.18
	Intron	38985473	35618588	91.36	2955334	2682056	90.75	5261274	4781675	90.88	30768865	28154857	91.5
	CDS	32870135	29111915	88.57	4010519	3564486	88.88	5846799	5203272	88.99	23012817	20344157	88.4
