# Supplementary material for: Changes in DNA methylation assessed by genomic bisulfite sequencing suggest a role for DNA methylation in cotton fruiting branch development
Source: PeerJ. 2018 Jun 14;6:e4945. doi: 10.7717/peerj.4945 (PMC6004305; doi:10.7717/peerj.4945)
Supplement: Supplemental Information 17 [file peerj-06-4945-s017.xlsx]

## Sheet: Sheet1
Sample	region	C			CG			CHG			CHH
		Total	Coverage	Coverage	Total	Coverage	Coverage	Total	Coverage	Coverage	Total	Coverage	Coverage
		sites	sites	rate(%)	sites	sites	rate(%)	sites	sites	rate(%)	sites	sites	rate(%)
Gh1nm	Low_complexity	1838762	1631151	88.71	78035	70143	89.89	93138	83347	89.49	1667589	1477661	88.61
	Simple_repeat	5310040	4755832	89.56	322488	291764	90.47	384838	350028	90.95	4602714	4114040	89.38
	LINE	208956	195622	93.62	17115	16023	93.62	30526	28408	93.06	161315	151191	93.72
	SINE	54916	52448	95.51	4125	3918	94.98	6468	6148	95.05	44323	42382	95.62
	DNA	70834	65341	92.25	6711	6261	93.29	10126	9175	90.61	53997	49905	92.42
	LTR	105930	79778	75.31	13043	9933	76.16	16352	13018	79.61	76535	56827	74.25
	Unknown	5724	5595	97.75	395	386	97.72	717	697	97.21	4612	4512	97.83
Gh2nm	Low_complexity	1838762	1623476	88.29	78035	69921	89.6	93138	83047	89.17	1667589	1470508	88.18
	Simple_repeat	5310040	4746780	89.39	322488	292088	90.57	384838	349885	90.92	4602714	4104807	89.18
	LINE	208956	195865	93.74	17115	16066	93.87	30526	28433	93.14	161315	151366	93.83
	SINE	54916	52489	95.58	4125	3925	95.15	6468	6157	95.19	44323	42407	95.68
	DNA	70834	65405	92.34	6711	6280	93.58	10126	9188	90.74	53997	49937	92.48
	LTR	105930	80022	75.54	13043	9963	76.39	16352	13064	79.89	76535	56995	74.47
	Unknown	5724	5585	97.57	395	386	97.72	717	697	97.21	4612	4502	97.61
Gh3nm	Low_complexity	1838762	1623250	88.28	78035	69963	89.66	93138	82980	89.09	1667589	1470307	88.17
	Simple_repeat	5310040	4752424	89.5	322488	292608	90.73	384838	350256	91.01	4602714	4109560	89.29
	LINE	208956	196004	93.8	17115	16050	93.78	30526	28466	93.25	161315	151488	93.91
	SINE	54916	52469	95.54	4125	3917	94.96	6468	6152	95.11	44323	42400	95.66
	DNA	70834	65475	92.43	6711	6280	93.58	10126	9206	90.91	53997	49989	92.58
	LTR	105930	80354	75.86	13043	10034	76.93	16352	13093	80.07	76535	57227	74.77
	Unknown	5724	5590	97.66	395	386	97.72	717	698	97.35	4612	4506	97.7
