# Supplementary material for: Changes in DNA methylation assessed by genomic bisulfite sequencing suggest a role for DNA methylation in cotton fruiting branch development
Source: PeerJ. 2018 Jun 14;6:e4945. doi: 10.7717/peerj.4945 (PMC6004305; doi:10.7717/peerj.4945)
Supplement: Supplemental Information 18 [file peerj-06-4945-s018.xlsx]

## Sheet: Sheet1
Pattern	Gh1nm(%)	Gh2nm(%)	Gh3nm(%)
C	19.73	20.48	20.18
CG	81.14	81.35	80.9
CHG	63.39	63.91	63.61
CHH	4.48	5.33	5.03
