# Supplementary material for: Changes in DNA methylation assessed by genomic bisulfite sequencing suggest a role for DNA methylation in cotton fruiting branch development
Source: PeerJ. 2018 Jun 14;6:e4945. doi: 10.7717/peerj.4945 (PMC6004305; doi:10.7717/peerj.4945)
Supplement: Supplemental Information 19 [file peerj-06-4945-s019.xlsx]

## Sheet: Sheet1
Sample	chr	C(%)	CG(%)	CHG(%)	CHH(%)
Gh1nm	A01	21.33	85.88	70.94	4.53
	A02	21.38	86.28	71.5	4.52
	A03	21.25	85.56	70.57	4.52
	A04	21.24	85.53	70.72	4.51
	A05	18.11	75.38	55.87	4.09
	A06	21.61	87.12	72.64	4.53
	A07	20.34	82.58	65.9	4.6
	A08	20.88	84.17	68.4	4.56
	A09	19.88	81.66	64.36	4.36
	A10	20.86	84.43	68.76	4.56
	A11	19.32	79.06	61.53	4.31
	A12	20.1	81.67	64.73	4.4
	A13	20.6	83.73	67.31	4.55
	D01	19.23	80.65	62.15	4.69
	D02	19.06	80.08	61.98	4.65
	D03	19.17	80.49	61.63	4.66
	D04	19.03	80.38	61.26	4.67
	D05	15.13	66.5	43.69	3.69
	D06	19.36	81.13	62.94	4.81
	D07	18.19	77.33	56.81	4.49
	D08	18.7	78.85	59.22	4.55
	D09	17.33	75.03	53.53	4.25
	D10	18.57	78.72	59.14	4.56
	D11	17.07	72.91	51.64	4.24
	D12	18.07	76.09	55.45	4.45
	D13	18.87	79.67	59.91	4.58
Gh2nm	A01	22.07	86.1	71.48	5.35
	A02	22.12	86.52	72.04	5.35
	A03	21.99	85.78	71.05	5.36
	A04	21.99	85.78	71.26	5.35
	A05	18.82	75.58	56.34	4.89
	A06	22.34	87.34	73.14	5.35
	A07	21.09	82.77	66.38	5.47
	A08	21.61	84.41	68.94	5.38
	A09	20.62	81.88	64.89	5.2
	A10	21.6	84.63	69.31	5.39
	A11	20.06	79.28	62.05	5.14
	A12	20.85	81.83	65.24	5.25
	A13	21.34	83.93	67.78	5.4
	D01	20	80.79	62.64	5.57
	D02	19.84	80.24	62.5	5.53
	D03	19.96	80.65	62.15	5.57
	D04	19.81	80.52	61.7	5.56
	D05	15.86	66.68	44.19	4.52
	D06	20.14	81.29	63.45	5.69
	D07	18.99	77.46	57.35	5.4
	D08	19.49	79.08	59.79	5.43
	D09	18.09	75.16	54.04	5.12
	D10	19.34	78.85	59.64	5.43
	D11	17.84	73.06	52.1	5.11
	D12	18.87	76.28	55.98	5.36
	D13	19.64	79.82	60.37	5.46
Gh3nm	A01	21.76	85.59	71.15	5.07
	A02	21.81	86.01	71.67	5.06
	A03	21.68	85.25	70.72	5.06
	A04	21.68	85.24	70.92	5.05
	A05	18.53	75.19	56.05	4.6
	A06	22.03	86.83	72.82	5.06
	A07	20.78	82.31	66.08	5.16
	A08	21.31	83.92	68.6	5.1
	A09	20.32	81.44	64.6	4.9
	A10	21.29	84.14	68.95	5.1
	A11	19.76	78.84	61.74	4.85
	A12	20.55	81.41	64.91	4.95
	A13	21.05	83.47	67.51	5.11
	D01	19.7	80.42	62.41	5.25
	D02	19.53	79.83	62.17	5.21
	D03	19.64	80.23	61.88	5.24
	D04	19.47	80.07	61.36	5.23
	D05	15.6	66.42	44	4.24
	D06	19.82	80.88	63.14	5.36
	D07	18.67	77.12	57.06	5.07
	D08	19.16	78.57	59.38	5.14
	D09	17.8	74.85	53.84	4.82
	D10	19.05	78.49	59.42	5.13
	D11	17.56	72.75	51.95	4.81
	D12	18.57	75.93	55.75	5.04
	D13	19.33	79.44	60.1	5.15
