# Supplementary material for: Changes in DNA methylation assessed by genomic bisulfite sequencing suggest a role for DNA methylation in cotton fruiting branch development
Source: PeerJ. 2018 Jun 14;6:e4945. doi: 10.7717/peerj.4945 (PMC6004305; doi:10.7717/peerj.4945)
Supplement: Supplemental Information 22 [file peerj-06-4945-s022.xlsx]

## Sheet: Sheet1
Pattern	mCG	mCHG	mCHH
Gh1nm	35658889	31606728	32488163
Gh2nm	35400177	31507107	39270819
Gh3nm	34376978	30789323	36774216
