# Supplementary material for: Changes in DNA methylation assessed by genomic bisulfite sequencing suggest a role for DNA methylation in cotton fruiting branch development
Source: PeerJ. 2018 Jun 14;6:e4945. doi: 10.7717/peerj.4945 (PMC6004305; doi:10.7717/peerj.4945)
Supplement: Supplemental Information 23 [file peerj-06-4945-s023.xlsx]

## Sheet: Sheet1
	DEM number	Target gene number
Gh2nm：Gh1nm	131	291
Gh3nm：Gh1nm	102	217
Gh3nm：Gh2nm	64	103
