# Supplementary material for: Changes in DNA methylation assessed by genomic bisulfite sequencing suggest a role for DNA methylation in cotton fruiting branch development
Source: PeerJ. 2018 Jun 14;6:e4945. doi: 10.7717/peerj.4945 (PMC6004305; doi:10.7717/peerj.4945)
Supplement: Supplemental Information 24 [file peerj-06-4945-s024.xlsx]

## Sheet: Sheet1
Symbol	Description	species
Gh_A01G1274	SPL16_ORYSJ Squamosa promoter-binding-like protein 16	Oryza sativa subsp. japonica
Gh_A01G1281	SPL2_ARATH Squamosa promoter-binding-like protein 2	Arabidopsis thaliana
Gh_A01G2095	SPL9_ARATH Squamosa promoter-binding-like protein 9	Arabidopsis thaliana
Gh_A03G0632	SPL6_ARATH Squamosa promoter-binding-like protein 6	Arabidopsis thaliana
Gh_A03G1083	SPL16_ORYSJ Squamosa promoter-binding-like protein 16	Oryza sativa subsp. japonica
Gh_A03G1092	SPL2_ARATH Squamosa promoter-binding-like protein 2	Arabidopsis thaliana
Gh_A04G1486	SPL2_ARATH Squamosa promoter-binding-like protein 2	Arabidopsis thaliana
Gh_A07G0275	PER46_ARATH Peroxidase 46	Arabidopsis thaliana
Gh_A07G2329	2ABB_ARATH Serine/threonine protein phosphatase 2A 55 kDa regulatory subunit B beta isoform	Arabidopsis thaliana
Gh_A11G0344	SP13B_ARATH Squamosa promoter-binding-like protein 13B	Arabidopsis thaliana
Gh_A11G0706	SPL7_ORYSJ Squamosa promoter-binding-like protein 7	Oryza sativa subsp. japonica
Gh_A11G2811	SPL17_ORYSJ Squamosa promoter-binding-like protein 17	Oryza sativa subsp. japonica
Gh_A12G1380	SPL16_ORYSJ Squamosa promoter-binding-like protein 16	Oryza sativa subsp. japonica
Gh_A13G0749	SPL6_ARATH Squamosa promoter-binding-like protein 6	Arabidopsis thaliana
Gh_D01G1495	SPL16_ORYSJ Squamosa promoter-binding-like protein 16	Oryza sativa subsp. japonica
Gh_D01G1503	SPL2_ARATH Squamosa promoter-binding-like protein 2	Arabidopsis thaliana
Gh_D02G1499	SPL16_ORYSJ Squamosa promoter-binding-like protein 16	Oryza sativa subsp. japonica
Gh_D02G1515	SPL2_ARATH Squamosa promoter-binding-like protein 2	Arabidopsis thaliana
Gh_D03G0920	SPL6_ARATH Squamosa promoter-binding-like protein 6	Arabidopsis thaliana
Gh_D04G1827	SPL2_ARATH Squamosa promoter-binding-like protein 2	Arabidopsis thaliana
Gh_D04G1985	SPL9_ARATH Squamosa promoter-binding-like protein 9	Arabidopsis thaliana
Gh_D07G0196	2ABB_ARATH Serine/threonine protein phosphatase 2A 55 kDa regulatory subunit B beta isoform	Arabidopsis thaliana
Gh_D11G0401	SP13B_ARATH Squamosa promoter-binding-like protein 13B	Arabidopsis thaliana
Gh_D11G0821	SPL7_ORYSJ Squamosa promoter-binding-like protein 7	Oryza sativa subsp. japonica
Gh_D12G1504	SPL16_ORYSJ Squamosa promoter-binding-like protein 16	Oryza sativa subsp. japonica
Gh_D13G0874	SPL6_ARATH Squamosa promoter-binding-like protein 6	Arabidopsis thaliana
Gh_A10G0359	WRK28_ARATH Probable WRKY transcription factor 28	Arabidopsis thaliana
Gh_D10G0367	WRK28_ARATH Probable WRKY transcription factor 28	Arabidopsis thaliana
Gh_A01G0768	PIGO_HUMAN GPI ethanolamine phosphate transferase 3	Homo sapiens
Gh_A05G1072	-
Gh_A12G0159	TOR_ARATH Serine/threonine-protein kinase TOR	Arabidopsis thaliana
Gh_D01G1791	DHX29_XENLA ATP-dependent RNA helicase DHX29	Xenopus laevis
Gh_D12G2835	KPYA_RICCO Pyruvate kinase isozyme A, chloroplastic	Ricinus communis PE
Gh_D13G1130	ALY2_ARATH Protein ALWAYS EARLY 2	Arabidopsis thaliana
Gh_D09G1593	PATL6_ARATH Patellin-6	Arabidopsis thaliana
Gh_D02G0343	RIR2A_ARATH Ribonucleoside-diphosphate reductase small chain A	Arabidopsis thaliana
